# Supplementary material
Source: PubMed Central journal article supplement (PMC8637964)

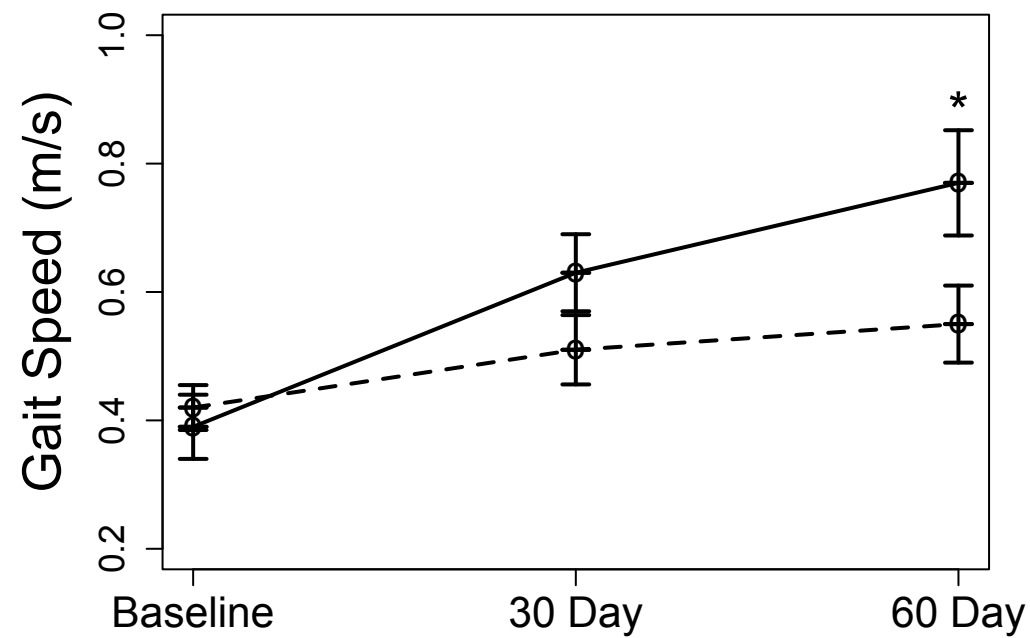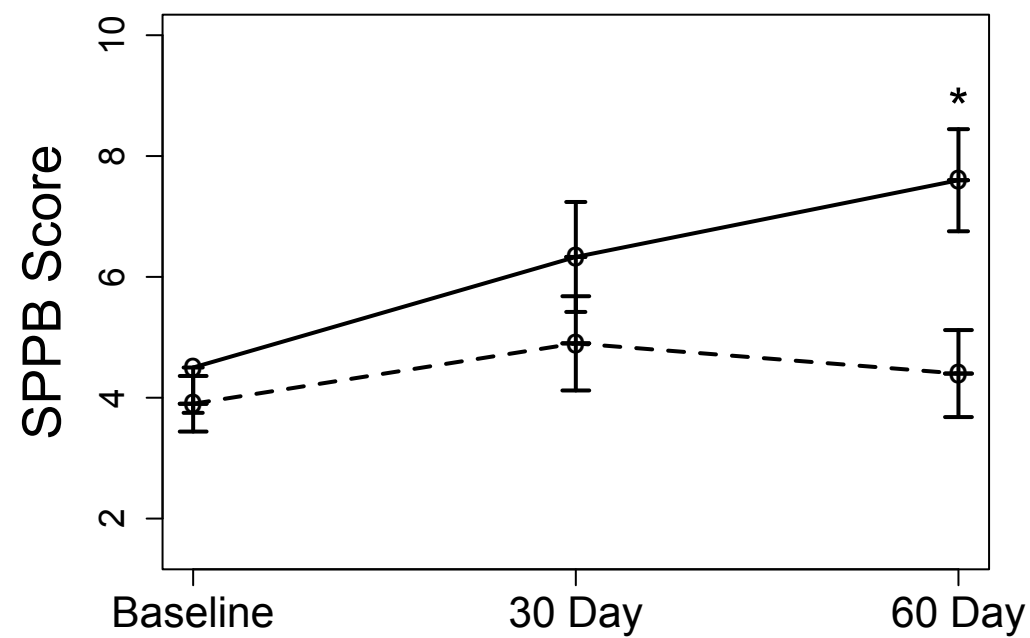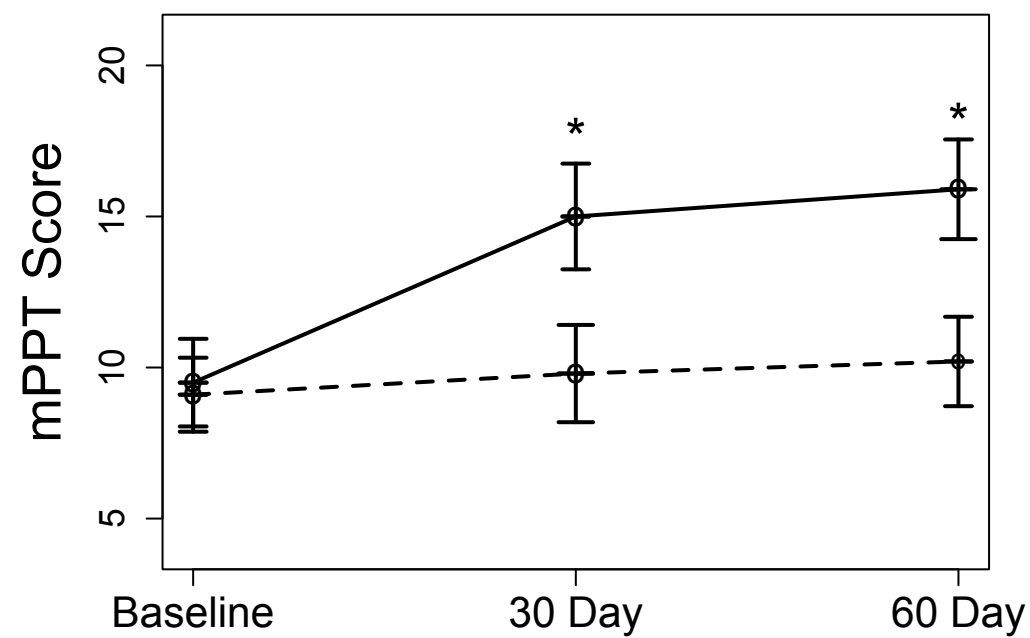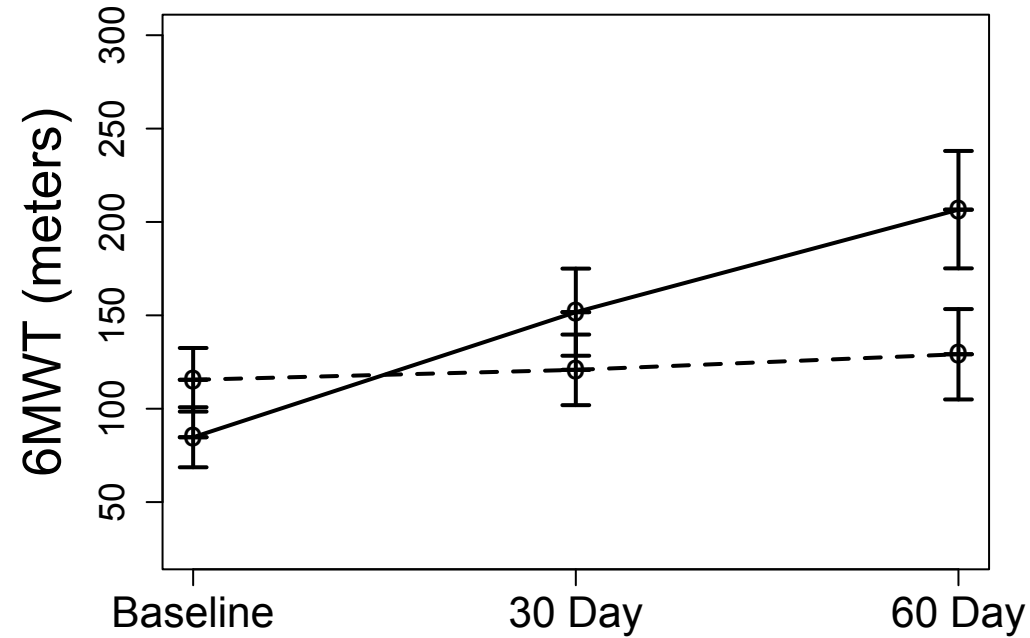

Supplement: NIHMS1756393-supplement-sup_1.pdf [file NIHMS1756393-supplement-sup_1.pdf]
